# Supplementary material
Source: MDPI journal article supplement (https://www.mdpi.com/2076-3417/11/12/5395)
Supplement: s1 [file s1]

**Figure S1.** ISAK full proforma.

| ISAK FULL PROFORMA              |  |        |                 |
|---------------------------------|--|--------|-----------------|
| Name 1                          |  |        |                 |
| Name 2                          |  |        |                 |
| Country                         |  |        |                 |
| Ethnicity                       |  |        |                 |
| Sex (male=1, female=2)          |  |        |                 |
| Sport                           |  |        |                 |
| Date of Measurement             |  |        |                 |
| Date of Birth                   |  |        |                 |
|                                 |  | Value  | Phantom Z-value |
| Body mass                       |  | 0 kg   |                 |
| Stretch stature                 |  | 0 cm   |                 |
| Triceps sf                      |  | 0.0 mm |                 |
| Subscapular sf                  |  | 0.0 mm |                 |
| Biceps sf                       |  | 0.0 mm |                 |
| Iliac Crest sf                  |  | 0.0 mm |                 |
| Supraspinale sf                 |  | 0.0 mm |                 |
| Abdominal sf                    |  | 0.0 mm |                 |
| Front Thigh sf                  |  | 0.0 mm |                 |
| Medial Calf sf                  |  | 0.0 mm |                 |
| Arm girth relaxed               |  | 0.0 cm |                 |
| Corrected arm girth             |  | 0.0 cm |                 |
| Arm girth flexed and tensed     |  | 0.0    |                 |
| Waist girth (min.)              |  | 0.0    |                 |
| Gluteal girth (max.)            |  | 0.0 cm |                 |
| Calf girth (max.)               |  | 0.0 cm |                 |
| Corrected calf girth (max.)     |  | 0.0 cm |                 |
| Humerus breadth (biepicondylar) |  | 0.0 cm |                 |
| Femur breadth (biepicondylar)   |  | 0.0 cm |                 |
